1

2 **Effect of sampling frequency on fractal fluctuations during treadmill walking**

3

4 Vivien Marmelat<sup>1\*</sup>, Austin Duncan<sup>1</sup>, Shane Meltz<sup>1</sup>

5

6 <sup>1</sup>Department of Biomechanics, University of Nebraska at Omaha, Omaha, Nebraska, 68184,

7

United States of America.

8

9 \*corresponding author

10 e-mail: [vmarmelat@unomaha.edu](mailto:vmarmelat@unomaha.edu) (VM)

## 11 **Abstract**

12 The temporal dynamics of stride-to-stride fluctuations in steady-state walking reveal important  
13 information about locomotor control and can be quantified using so-called fractal analyses,  
14 notably the detrended fluctuation analysis (DFA). Gait dynamics are often collected during  
15 treadmill walking using 3-D motion capture to identify gait events from kinematic data. The  
16 sampling frequency of motion capture systems may impact the precision of event detection and  
17 consequently impact the quantification of stride-to-stride variability. This study aimed i) to  
18 determine if collecting multiple walking trials with different sampling frequency affects DFA  
19 values of spatiotemporal parameters during treadmill walking, and ii) to determine the reliability  
20 of DFA values across downsampled conditions. Seventeen healthy young adults walked on a  
21 treadmill while their gait dynamics was captured using different sampling frequency (60, 120  
22 and 240 Hz) in each condition. We also compared data from the highest sampling frequency to  
23 downsampled versions of itself. We applied DFA to the following time series: step length, time  
24 and speed, and stride length, time and speed. Reliability between experimental conditions and  
25 between downsampled conditions were measured with intraclass correlation estimates and their  
26 95% confident intervals, calculated based on a single-measurement, absolute-agreement, two-  
27 way mixed-effects model (ICC 3,1). Intraclass correlation analysis revealed a poor reliability of  
28 DFA results between conditions using different sampling frequencies, but a relatively good  
29 reliability between original and downsampled spatiotemporal variables. Our results suggest that  
30 sampling frequency (between 60 and 240 Hz) does not significantly alter DFA. A small trend  
31 toward lower DFA values with lower sampling frequencies lead us to recommend that gait  
32 kinematics should be collected at around 120 Hz, which provides an optimal compromise  
33 between event detection accuracy and processing time.

## 34 **Introduction**

35           The temporal organization of stride-to-stride fluctuations during steady-state walking can  
36 reveal important information about locomotor control [1-6]. With aging and neurodegenerative  
37 diseases, gait variability become more random [7-8], compared to the persistent, fractal-like  
38 pattern of fluctuations observed in healthy young adults, where large fluctuations are likely to be  
39 followed by larger fluctuations, and vice-versa [4,9]. In healthy adults, the temporal organization  
40 of fluctuations may also change under different conditions: during metronomic walking (i.e.,  
41 stepping in time with an auditory metronome), stride time fluctuations become anti-persistent,  
42 i.e., large fluctuations are likely to be followed by smaller fluctuations, and vice-versa [1,9].  
43 Similarly, stride length and stride speed become anti-persistent when healthy young adults step  
44 on visual targets or walk on a treadmill, respectively [3,10].

45           A dominating method to analyze stride-to-stride fluctuations is the detrended fluctuation  
46 analysis (DFA) [11], because it provides more accurate results for ‘short’ time series (<1000 data  
47 points) compared to other techniques such as power spectral analysis or rescaled range analysis  
48 [12-14]. DFA partitions a time series (e.g., stride time intervals) of length  $N$  into nonoverlapping  
49 windows and calculates the average root mean square (RMS) at each window size. The average  
50 RMS at every window size is then plotted against the corresponding window size on a log-log  
51 plot. The slope resulting from the line of best fit produces the scaling exponent  $\alpha$ -DFA. In an  
52 effort to standardize DFA processing, researchers determined some gait-specific parameters  
53 required to produce accurate DFA results. Based on both experimental and artificial time series,  
54 it is recommended to consider time series of at least 500 data points [13,15-17]. The  
55 recommended range of window sizes is 16 to  $N/9$  stride (or step) intervals [18], although for  
56 shorter time series a range of 10 to  $N/4$  may be preferred [15,19]. Recent investigations also

57 recommended to use a modified version of the original DFA algorithm, namely the evenly  
58 spaced average DFA, to increase the precision of the estimation of the scaling exponent [19-20].

59 In the context of locomotion, it is also important to consider the parameters underlying  
60 data acquisition and pre-processing before applying DFA. In particular, motion capture systems  
61 are typically used to record gait kinematics during treadmill walking, but there is no consensus  
62 on the most appropriate sampling frequency to reliability apply DFA. While sampling frequency  
63 may not have a significant effect on linear measures of gait (e.g., mean and coefficient of  
64 variation), it is more likely to influence DFA, because this technique directly depends on the  
65 accuracy and precision of gait event detections. In the context of postural control, Rhea et al.  
66 [21] found that downsampling linearly decreased the  $\alpha$ -DFA scaling exponent of center of  
67 pressure (CoP) displacement and CoP velocity. On the other hand, higher sampling frequencies  
68 are more likely to introduce artificial white noise (i.e., to decrease  $\alpha$ -DFA toward more  
69 randomness), and may increase the processing time for little or no benefits.

70 The goal of this study was to provide guidelines regarding the best sampling frequency to  
71 capture fractal dynamics of gait during treadmill walking. We calculated  $\alpha$ -DFA values from  
72 spatiotemporal variables in different conditions where motion was captured at different sampling  
73 frequencies. We compared the average values between conditions, but also the reliability of  $\alpha$ -  
74 DFA between conditions, using intraclass correlation (ICC) coefficients. Low ICC between  
75 different conditions may be due to low between-trial consistency, independently from the  
76 sampling frequency. Therefore, we also compared data from a high sampling frequency  
77 condition to downsampled data from the same condition.

78 In summary, this study addressed the following research questions: does motion capture  
79 sampling frequency affect  $\alpha$ -DFA of spatiotemporal parameters during treadmill walking? What

80 is the reliability of  $\alpha$ -DFA values across downsampled conditions? Our central hypothesis was  
81 that lower sampling frequency and downsampling will shift  $\alpha$ -DFA values toward 0.5, i.e., more  
82 randomness due to lower precision in the estimation of gait events.

83

## 84 **Materials and Methods**

### 85 **Participants**

86 Seventeen young adults (Age  $23.9 \pm 2.7$  years, 7 females) were recruited through convenience  
87 sampling to participate in the study. All participants were free from cognitive, neurological,  
88 muscular, or orthopaedic impairments. All participants provided written informed consent  
89 according to the procedures approved by the local Institutional Review Board.

### 90 **Equipment**

91 All participants wore their preferred walking shoes and wore a tight-fitting suit. Participants were  
92 affixed with 11 retroreflective markers on the following anatomical landmarks to track their  
93 motion while walking on a motorized treadmill (Bertec, Columbus, OH): left and right anterior  
94 iliac spines, left and right posterior iliac spines, sacrum, dorsal region of the left and right foot  
95 between the great toe and long toe, left and right heels, and left and right lateral malleoli. Marker  
96 motion was captured through 8 infrared cameras (Vicon, Centennial, CO) at different sampling  
97 frequencies in each condition (cf. below).

### 98 **Protocol**

99 Participants completed three 15-minute walking trials at their preferred speed. Prior to the trials,  
100 individual preferred speed was determined by gradually increasing and decreasing the treadmill  
101 speed. The speed at which participants reported being comfortable walking for 15 minutes was

102 selected as their preferred walking speed. Participants were given two minutes to walk at their  
103 preferred speed for familiarization before the experimental trials begins. Each trial was collected  
104 at a different sampling frequency - 60 Hz, 120 Hz, and 240 Hz - in a randomized order.  
105 Experimental conditions are described later in this paper by the sampling frequency number (i.e.,  
106 conditions 60, 120, 240).

## 107 **Data Processing**

108 Gait events were automatically identified with a custom Matlab function based on the heel, toe,  
109 and the average antero-posterior position of hip markers to find the heel strikes and toe offs [22].  
110 We also downsampled the kinematic data from the 240 condition to 120 Hz and 60 Hz (i.e.,  
111 further referred as DS120 and DS60 conditions, respectively), using Matlab *downsample*  
112 function. In this study, we focused on the following spatiotemporal variables from each of the  
113 five conditions (three experimental conditions: 60, 120 and 240; two downsampled conditions:  
114 DS60 and DS120): step length, stride length, step time, stride time, step speed and stride speed.  
115 Each time series were reduced to the length of the shortest time series (i.e., 740 intervals) for  
116 reliable comparisons across participants and conditions. The first 60 step or stride intervals in  
117 each time series were removed to reduce the potential confounding effect of gait initiation.  
118 Therefore, further analyses considered only 679 step or stride intervals (Fig 1). We calculated the  
119 mean, coefficient of variation (CV) and scaling exponent ( $\alpha$ -DFA) from each spatiotemporal  
120 variable. The scaling exponent was calculated using the evenly spaced average DFA, which was  
121 briefly described in the Introduction. We used a range of window from 10 to  $N/8$ , where  $N$  is the  
122 time series length. We selected 18 points in the diffusion plot for the evenly spaced average DFA  
123 [19]. An  $\alpha$ -DFA value between 0.5 and 1 indicates persistent fluctuations, whereas 0.5 indicates  
124 random fluctuations.

125

126 **Fig 1. Time series.** Representative time series from a participant in the three experimental  
127 conditions (top three) and the two downsampled conditions (bottom two).

128

## 129 **Statistical analysis**

130 One-way repeated measure ANOVAs were performed 1) between conditions 240, 120, and 60,  
131 and 2) between conditions 240, DS120, and DS60 (mean, CV and  $\alpha$ -DFA) for each of the six  
132 spatiotemporal variables. Post-hoc analysis entailed Tukey's multiple comparison's tests. For  
133 each spatiotemporal variable, intraclass correlation (ICC) estimates and their 95% confident  
134 intervals were calculated using SPSS statistical package version 23 (SPSS Inc, Chicago, IL)  
135 based on a single-measurement, absolute-agreement, two-way mixed-effects model (ICC 3,1) to  
136 determine the reliability of mean, CV and  $\alpha$ -DFA [23-24]. We compared 1) conditions 240, 120  
137 and 60, and 2) conditions 240, DS120 and DS60. The reliability was graded based on the lower  
138 95% CI values [24], with values less than 0.50 indicating poor reliability, values between 0.50  
139 and 0.75 indicating moderate reliability, values between 0.75 and 0.90 indicating good reliability  
140 and values above 0.90 indicating excellent reliability [23]. Level of statistical significance for  
141 every test was set at a  $p$ -value  $< 0.05$ .

142

## 143 **Results**

144 Data from three participants were excluded due to technical difficulties. There was no  
145 statistically significant difference between sides, so we only report results from the right side in  
146 further analyses for the sake of clarity.

## 147 **Effect of sampling frequency**

148 There was no statistically significant difference between any conditions for any measures of any  
 149 spatiotemporal variables ( $p>0.05$ ). The ICCs revealed good to excellent reliability for mean of  
 150 step length and step speed, and excellent reliability for all other spatiotemporal variables (Table  
 151 1). Based on the 95% confidence interval, the reliability of CV was poor to good for stride  
 152 length, step time, stride time and stride speed, and moderate to excellent for step length and step  
 153 speed. In contrast, for  $\alpha$ -DFA the ICC coefficients were poor to good, and the 95% confidence  
 154 interval revealed poor to moderate reliability for step length, step time, step speed and stride  
 155 speed, and poor to good reliability for stride length and stride time (Fig 2).

156

157 **Table 1. Mean and standard deviation (SD) of time series mean, CV and  $\alpha$ -DFA from**  
 158 **condition 240, condition 120 and condition 60, and corresponding intraclass correlations**  
 159 **and 95% confidence intervals.**

|                      |               | Mean (SD) for conditions |             |             | ICC [95% CI]         |
|----------------------|---------------|--------------------------|-------------|-------------|----------------------|
|                      |               | 240                      | 120         | 60          |                      |
| <b>Step length</b>   | Mean (m)      | 0.63 (0.06)              | 0.62 (0.06) | 0.62 (0.07) | 0.915 [0.811-0.969]  |
|                      | CV (%)        | 1.75 (0.64)              | 1.81 (0.57) | 2.00 (0.58) | 0.804 [0.585-0.929]  |
|                      | $\alpha$ -DFA | 0.72 (0.13)              | 0.68 (0.09) | 0.67 (0.08) | 0.309 [-0.004-0.652] |
| <b>Stride length</b> | Mean (m)      | 1.26 (0.11)              | 1.26 (0.11) | 1.26 (0.11) | 0.991 [0.979-0.997]  |
|                      | CV (%)        | 1.30 (0.43)              | 1.41 (0.51) | 1.45 (0.32) | 0.620 [0.326-0.840]  |
|                      | $\alpha$ -DFA | 0.77 (0.13)              | 0.75 (0.12) | 0.73 (0.11) | 0.536 [0.214-0.797]  |
| <b>Step time</b>     | Mean (s)      | 0.54 (0.04)              | 0.53 (0.04) | 0.54 (0.04) | 0.992 [0.981-0.997]  |
|                      | CV (%)        | 1.55 (0.47)              | 1.67 (0.46) | 1.93 (0.33) | 0.509 [0.175-0.783]  |



|               |               |             |             |             |                       |
|---------------|---------------|-------------|-------------|-------------|-----------------------|
|               | $\alpha$ -DFA | 0.73 (0.11) | 0.68 (0.09) | 0.65 (0.09) | 0.382 [0.079-0.697]   |
| <b>Stride</b> | Mean (s)      | 1.07 (0.07) | 1.07 (0.07) | 1.07 (0.07) | 0.993 [0.984-0.998]   |
| <b>time</b>   | CV (%)        | 1.25 (0.54) | 1.28 (0.48) | 1.32 (0.30) | 0.542 [0.222-0.801]   |
|               | $\alpha$ -DFA | 0.79 (.14)  | 0.77 (0.10) | 0.77 (0.11) | 0.546 [0.227-0.803]   |
| <b>Step</b>   | Mean (m/s)    | 1.17 (0.12) | 1.17 (0.12) | 1.15 (0.14) | 0.911 [0.801-0.968]   |
| <b>speed</b>  | CV (%)        | 1.74 (0.57) | 1.71 (0.42) | 1.88 (0.39) | 0.861 [0.680-0.950]   |
|               | $\alpha$ -DFA | 0.55 (0.06) | 0.56 (0.06) | 0.54 (0.05) | -0.072 [-0.290-0.301] |
| <b>Stride</b> | Mean (m/s)    | 1.18 (0.12) | 1.18 (0.12) | 1.18 (0.12) | 0.998 [0.995-0.999]   |
| <b>speed</b>  | CV (%)        | 1.34 (0.84) | 1.17 (0.25) | 1.39 (0.32) | 0.370 [0.040-0.698]   |
|               | $\alpha$ -DFA | 0.43 (0.07) | 0.50 (0.20) | 0.53 (0.26) | 0.382 [0.052-0.706]   |

160

161 **Figure 2. Results.** Individual  $\alpha$ -DFA values for stride length (left), stride time (middle) and  
 162 stride speed (right) in the three experimental conditions and the two downsampled conditions.

163

## 164 **Effect of downsampling**

165 There was no statistically significant difference between any conditions for any measures of any  
 166 spatiotemporal variables ( $p > 0.05$ ), except for CV of step time ( $F(df1, df2) = 3.917, p = 0.028$ ).

167 The ICCs revealed excellent absolute agreement of means for all spatiotemporal variables (Table

168 2). For CV, while ICC coefficients were above 0.9 for all spatiotemporal variables, based on the

169 95% confidence interval the reliability was poor to excellent for step length, moderate to

170 excellent stride length, stride time and step speed, good to excellent for stride speed and

171 excellent for step time. For  $\alpha$ -DFA, the 95% confidence interval revealed moderate to excellent

172 reliability for step length, step time, stride time, step speed and stride speed, and good to  
 173 excellent for stride length (Figure 2).

174

175 **Table 2. Mean and standard deviation (SD) of time series mean, CV and  $\alpha$ -DFA from**  
 176 **condition 240, condition DS120 and condition DS60, and corresponding intraclass**  
 177 **correlations and 95% confidence intervals.**

|                      |               | Mean (SD) for conditions |             |             | ICC [95% CI]        |
|----------------------|---------------|--------------------------|-------------|-------------|---------------------|
|                      |               | 240                      | DS120       | DS60        |                     |
| <b>Step length</b>   | Mean (m)      | 0.63 (0.06)              | 0.63 (0.06) | 0.63 (0.06) | 0.999 [0.998-1]     |
|                      | CV (%)        | 1.75 (0.64)              | 1.80 (0.61) | 1.98 (0.59) | 0.958 [0.475-0.991] |
|                      | $\alpha$ -DFA | 0.72 (0.13)              | 0.71 (0.11) | 0.68 (0.11) | 0.906 [0.747-0.968] |
| <b>Stride length</b> | Mean (m)      | 1.26 (0.11)              | 1.26 (0.11) | 1.26 (0.11) | 1 [1-1]             |
|                      | CV (%)        | 1.30 (0.43)              | 1.34 (0.41) | 1.45 (0.39) | 0.959 [0.501-0.991] |
|                      | $\alpha$ -DFA | 0.77 (0.13)              | 0.75 (0.12) | 0.73 (0.11) | 0.952 [0.888-0.983] |
| <b>Step time</b>     | Mean (s)      | 0.54 (0.04)              | 0.54 (0.04) | 0.54 (0.04) | 1 [1-1]             |
|                      | CV (%)        | 1.55 (0.47)              | 1.65 (0.77) | 1.98 (0.37) | 0.978 [0.946-0.992] |
|                      | $\alpha$ -DFA | 0.73 (0.11)              | 0.72 (0.10) | 0.66 (0.10) | 0.88 [0.736-0.956]  |
| <b>Stride time</b>   | Mean (s)      | 1.07 (0.07)              | 1.07 (0.07) | 1.07 (0.07) | 1 [1-1]             |
|                      | CV (%)        | 1.25 (0.54)              | 1.28 (0.53) | 1.41 (0.50) | 0.97 [0.594-0.993]  |
|                      | $\alpha$ -DFA | 0.79 (.14)               | 0.78 (0.14) | 0.74 (0.14) | 0.945 [0.662-0.986] |
| <b>Step speed</b>    | Mean (m/s)    | 1.17 (0.12)              | 1.17 (0.12) | 1.17 (0.12) | 1 [1-1]             |
|                      | CV (%)        | 1.74 (0.57)              | 1.79 (0.56) | 1.95 (0.49) | 0.952 [0.532-0.989] |
|                      | $\alpha$ -DFA | 0.55 (0.06)              | 0.54 (0.06) | 0.54 (0.04) | 0.767 [0.537-0.909] |

|               |               |             |             |             |                     |
|---------------|---------------|-------------|-------------|-------------|---------------------|
| <b>Stride</b> | Mean (m/s)    | 1.18 (0.12) | 1.18 (0.12) | 1.18 (0.12) | 1 [1-1]             |
| <b>speed</b>  | CV (%)        | 1.34 (0.84) | 1.38 (0.83) | 1.58 (0.83) | 0.964 [0.768-0.991] |
|               | $\alpha$ -DFA | 0.43 (0.07) | 0.43 (0.06) | 0.45 (0.06) | 0.820 [0.624-0.932] |

178

## 179 **Discussion**

180 The goal of this study was to determine how motion capture sampling frequency and  
181 downsampling procedures affect DFA during treadmill walking. Our four main findings are that  
182 i) in general, mean, CV and  $\alpha$ -DFA values of all spatiotemporal variables were similar between  
183 conditions, whether the data was collected at different sampling frequencies or downsampled, ii)  
184  $\alpha$ -DFA values were not reliable between conditions using different sampling frequencies, iii)  $\alpha$ -  
185 DFA values were reliable between original and downsampled spatiotemporal variables, and iv)  
186  $\alpha$ -DFA from stride intervals were more reliable than  $\alpha$ -DFA from step intervals.  
187 Our original hypothesis that lower sampling frequency shift  $\alpha$ -DFA values toward more  
188 randomness was not supported. We observed a small, non-significant trend toward a reduction in  
189 the scaling exponent  $\alpha$ -DFA for step length, stride length, step time and stride time, for data  
190 originally sampled at 60 Hz or downsampled at 60 Hz. Previous studies have used a range of  
191 sampling frequencies to study gait dynamics during treadmill or overground walking  
192 [2,5,18,25,26]. Our results suggest that when the research question focuses on within-group or  
193 between-group comparisons, a sampling frequency as low as 60 Hz may be able to capture  
194 differences. While the reductions in  $\alpha$ -DFA were not significant, 120 Hz may allow for more  
195 precise event detection. In addition, walking speed may also play a role: as lower limbs move  
196 faster, a greater sampling frequency is needed to capture gait events with the same precision.  
197 While this question was beyond the scope of this study and will need to be addressed later, it is

198 an important factor to consider when selecting motion capture sampling frequency. It is also  
199 important to note that the number of potential individual values present in a time series depend  
200 not only from the sampling frequency, but also from the coefficient of variation (or the range) in  
201 that time series. As an illustration, for a stride time series centered around 1-sec with a CV of 5%  
202 (i.e., a range of [0.95 – 1.05]), sampling at 100 Hz would lead to 11 potential values (i.e. 0.95,  
203 0.96, 0.97, etc.). In contrast, a CV of 2% (i.e., a range of [0.98 – 1.02]) would lead to only 5  
204 potential values and a much more ‘squared’ signal.

205 While  $\alpha$ -DFA values were not significantly different between conditions, they were not very  
206 reliable. Based on the lower 95% confidence intervals, the reliability was graded as poor for all  
207 spatiotemporal variables (Table 1). This is an important finding, as it suggests that collecting  
208 data from the same participant using different sampling frequencies would lead to very different  
209 scaling exponents in each condition. However, as stressed in the Introduction, a low reliability  
210 between conditions may also arise independently from sampling frequencies. While previous  
211 studies have shown that  $\alpha$ -DFA presented relatively high within-day reliability [26-27], it is  
212 possible to observe within-subject differences in gait dynamics between conditions. This may  
213 arise from different factors such as fluctuations in attention levels, fatigue or habituation to  
214 treadmill walking. We anticipated such potential confounding effects, and therefore studied the  
215 effect of downsampling (from the highest sampling frequency).

216 We found that the reliability of  $\alpha$ -DFA values graded as moderate and good between original and  
217 downsampled spatiotemporal variables (Table 2). This result contrasts with our previous finding  
218 (comparing different conditions), and suggests that the low reliability observed between  
219 conditions sampled at different frequencies originated from within-subject differences more than  
220 reflecting a true effect of sampling frequency.

221 It should also be stressed that  $\alpha$ -DFA from stride intervals were more reliable than step intervals.  
222 This may be because a single stride interval ‘encompasses’ two step intervals (i.e., one from each  
223 side). Therefore, small corrections occurring at the step level may not be reflected in a more  
224 global stride interval.

225 Our study presents several limitations. We collected only healthy young adults, as in previous  
226 methodological studies, because healthy gait patterns are often used as a reference [17,25,26,30].  
227 We cannot exclude the possibility that the results would be different with other populations such  
228 as older adults or people with gait disorders. Another limitation of our study is that we only  
229 considered three different sampling frequencies. While technically motion can be captured at any  
230 sampling frequency (i.e., on a continuous scale), we chose to focus on the most representative  
231 values reported in previous literature. In addition, collecting human gait below 50 Hz would  
232 certainly alter not only DFA results but also mean and CV, and collecting above 240 Hz would  
233 dramatically increase processing time. Finally, there is little reason to think that DFA results  
234 from data sampled at 120 Hz would significantly differ from data sampled at a slightly lower  
235 frequency (e.g., 100 Hz), because our results at 240 Hz or 120 Hz were very similar. As  
236 mentioned earlier, walking speed and the coefficient of variation of time series may also play a  
237 role. Future studies should investigate the reliability of DFA results at different walking velocity.  
238 Another limitation is that we only considered treadmill walking, but our conclusions may not  
239 hold true for overground walking. Note that the study of fractal dynamics during overground  
240 walking is often performed on data captured with small accelerometers or footswitches  
241 [1,4,7,10,16]. Footswitches in particular – while limited in capturing only temporal variables  
242 such as stride time intervals – are often capable of higher sampling frequency (e.g., data is often  
243 collected at 1000 Hz or more). A final limitation of this study was that we focused solely on the

244 scaling exponent  $\alpha$ -DFA, and did not test other techniques. While this may be considered a  
245 limitation, our goal in this paper was to provide guidelines specifically related to the application  
246 of DFA to spatiotemporal variables. Previous studies have already compared the effect of  
247 sampling frequency on other measures of gait [30], and future studies may use our data (S1  
248 Matlab file) to ask other questions related to the reliability of gait parameters during treadmill  
249 walking.

250 In conclusion, sampling frequency seems to have little effect on  $\alpha$ -DFA applied to  
251 spatiotemporal variables during treadmill walking. Overall, stride intervals seem to provide more  
252 reliable results than step intervals. While no significant differences were observed between  
253 conditions, a small trend toward lower  $\alpha$ -DFA values with lower sampling frequencies lead us to  
254 recommend that data should be collected at around 120 Hz. This seems to be the best  
255 compromise between precise event detection and reduced processing time.

256

## 257 **Acknowledgments**

258 The authors thank the volunteers for their participation, Daniel Jaravata for his help with data  
259 collection, and Ben Senderling and William Denton for technical support. This work was  
260 supported by the Center for Research in Human Movement Variability of the University of  
261 Nebraska at Omaha (NIH P20GM109090).

262

## 263 **References**

- 264 1. Delignières D, Torre K. Fractal dynamics of human gait: a reassessment of the 1996 data of  
265 Hausdorff et al. J Appl Physiol. 2009;106(4): 1272-1279.

- 266 2. Dingwell JB, Cusumano JP. Re-interpreting detrended fluctuation analyses of stride-to-stride  
267 variability in human walking. *Gait Posture*. 2010;32: 348-353.
- 268 3. Dingwell JB, Cusumano JP. Identifying stride-to-stride control strategies in human treadmill  
269 walking. *PLoS ONE*. 2015; 10(4): e0124879.
- 270 4. Hausdorff JM, Peng CK, Ladin Z, Wei JY, Goldberger AL. Is walking a random walk?  
271 Evidence for long-range correlations in the stride interval of human gait. *J Appl Physiol*.  
272 1995;78: 349–358.
- 273 5. Rock CG, Marmelat V, Yentes J, Sui KC, Takahashi KZ. Interaction between step-to-step  
274 variability and metabolic cost of transport during human walking. *J Exp Biol*. 2018;221:  
275 jeb181834.
- 276 6. Roerdink M, Daffertshofer A, Marmelat V, Beek PJ. How to sync to the beat of a persistent  
277 fractal metronome without falling off the treadmill? *PLoS ONE*. 2015;10(7): e0134148.
- 278 7. Hausdorff JM, Mitchell SL, Firtion R, Peng CK, Cudkowicz ME, Wei JY, Goldberger,  
279 AL. Altered fractal dynamics of gait: reduced stride-interval correlations with aging and  
280 Huntington’s disease. *J Appl Physiol*. 1997;82: 262–269.
- 281 8. Warlop T, Detrembleur C, Bollens B, Stoquart G, Crevecoeur F, Jeanjean A, Lejeune TM.  
282 Temporal organization of stride duration variability as a marker of gait instability in  
283 Parkinson’s disease. *J Rehab Med*. 2016;48: 865-871.
- 284 9. Marmelat V, Torre K, Beek PJ, Daffertshofer A. Persistent fluctuations in stride intervals  
285 under fractal auditory stimulation. *PLoS ONE*. 2014;9(3): e91949.
- 286 10. Terrier P. Fractal fluctuations in human walking: comparison between auditory and visually  
287 guided stepping. *Ann Biomed Eng*. 2016;44: 2785-93.

- 288 11. Peng CK, Mietus J, Hausdorff JM, Havlin S, Stanley HE, Goldberger AL. Long-range  
289 anticorrelations and non-Gaussian behavior of the heartbeat. *Phys Rev Lett.* 1993;70: 1343–  
290 1346.
- 291 12. Chen Z, Ivanov PC, Hu K, Stanley HE. Effect of nonstationarities on detrended fluctuation  
292 analysis. *Phys Rev E.* 2002;65(4): 041107.
- 293 13. Delignières D, Ramdani S, Lemoine L, Torre K, Fortes M, Ninot G. Fractal analysis for short  
294 time series: a reassessment of classical methods. *J Math Psychol.* 2006;50: 525–544.
- 295 14. Marmelat V, Delignieres D. Complexity, coordination, and health: avoiding pitfalls and  
296 erroneous interpretations in fractal analyses. *Medicina (Kaunas).* 2011;47:393-398.
- 297 15. Marmelat V, Meidinger RL. Fractal analysis of gait in people with Parkinson’s disease: three  
298 minutes is not enough. *Gait Posture.* 2019;70:229-234.
- 299 16. Marmelat V, Reynolds NR, Hellman A. Gait dynamics in Parkinson’s disease: short gait  
300 trials “stitched” together provide different fractal fluctuations compared to longer trials. *Front*  
301 *Physiol.* 2018;9:861.
- 302 17. Warlop T, Bollens B, Detrembleur C, Stoquart G, Lejeune T, Crevecoeur F. Impact of series  
303 length on statistical precision and sensitivity of autocorrelation assessment in human  
304 locomotion. *Hum Mov Sci.* 2018;55: 31-42.
- 305 18. Damouras S, Chang MD, Sejdić E, Chau T. An empirical examination of detrended  
306 fluctuation analysis for gait data. *Gait Posture.* 2010; 31: 336-340.
- 307 19. Liddy JJ, Haddad JM. Evenly spaced Detrended Fluctuation Analysis: Selecting the number  
308 of points for the diffusion plot. *Physica A.* 2018; 491: 233-248.
- 309 20. Almurad ZMH., Delignières D. Evenly spacing in Detrended Fluctuation Analysis. *Physica*  
310 *A.* 2016;451: 63-69.



- 311 21. Rhea CK, Kiefer AW, Wright WG, Raisbeck LD, Haran FJ. Interpretation of postural control  
312 may change due to data processing techniques. *Gait Posture*. 2015;41(2):731-735.
- 313 22. Zeni JA, Richards JG, Higginson JS. Two simple methods for determining gait events during  
314 treadmill and overground walking using kinematic data. *Gait Posture*. 2008;27(4): 710-714.
- 315 23. Cicchetti DV. Guidelines, criteria, and rules of thumb for evaluating normed and  
316 standardized assessment instruments in psychology. *Psychol Assess*. 1994;6(4): 284.
- 317 24. Koo TK, Li MY. A guideline of selecting and reporting intraclass correlation coefficients for  
318 reliability research. *J Chiropract Med*. 2016;15(2): 155–163.
- 319 25. Kuznetsov NA, Rhea CK. Power considerations for the application of detrended fluctuation  
320 analysis in gait variability studies. *PLoS ONE*. 2017;12(3): e0174144.
- 321 26. Pierrynowski MR, Gross A, Miles M, Galea V, McLaughlin L, McPhee C. Reliability of the  
322 long-range power-law correlations obtained from the bilateral stride intervals in  
323 asymptomatic volunteers whilst treadmill walking. *Gait Posture*. 2005;22: 46–50.
- 324 27. Choi S, Kang DW, Seo JW, Tack GR. Reliability of the walking speed and gait dynamics  
325 variables while walking on a feedback-controlled treadmill. *J Biomech*. 2015;48: 1336-1339.
- 326 28. Warlop T, Detrembleur C, Stoquart G, Jeanjean A. Gait complexity and regularity are  
327 differently modulated by treadmill walking in Parkinson’s disease and healthy population.  
328 *Front Physiol*. 2018;9:68.
- 329 29. Wiens C, Denton W, Schieber MN, Harley R, Marmelat V, Myers SA, Yentes JM. Walking  
330 speed and spatiotemporal step mean measures are reliable during feedback-controlled  
331 treadmill walking; however, spatiotemporal step variability is not reliable. *J Biomech*.  
332 2019;83(23), 221-226.

333 30. Raffalt PC, McCamley J, Denton W, Yentes JM. Sampling frequency influences sample  
334 entropy of kinematics during walking. Med Biol Eng Comput.  
335 2018;<https://doi.org/10.1007/s11517-018-1920-2>.

336

337 **S1 Matlab. Raw data.** Spatiotemporal time series from 14 healthy young adults walking on a  
338 treadmill at their self-selected speed, in different conditions characterized by different sampling  
339 frequency of the 3D motion capture system. Conditions '240ds120' and '240ds60' correspond to  
340 the downsampled data from 240 Hz to 120 Hz and 60 Hz, respectively.

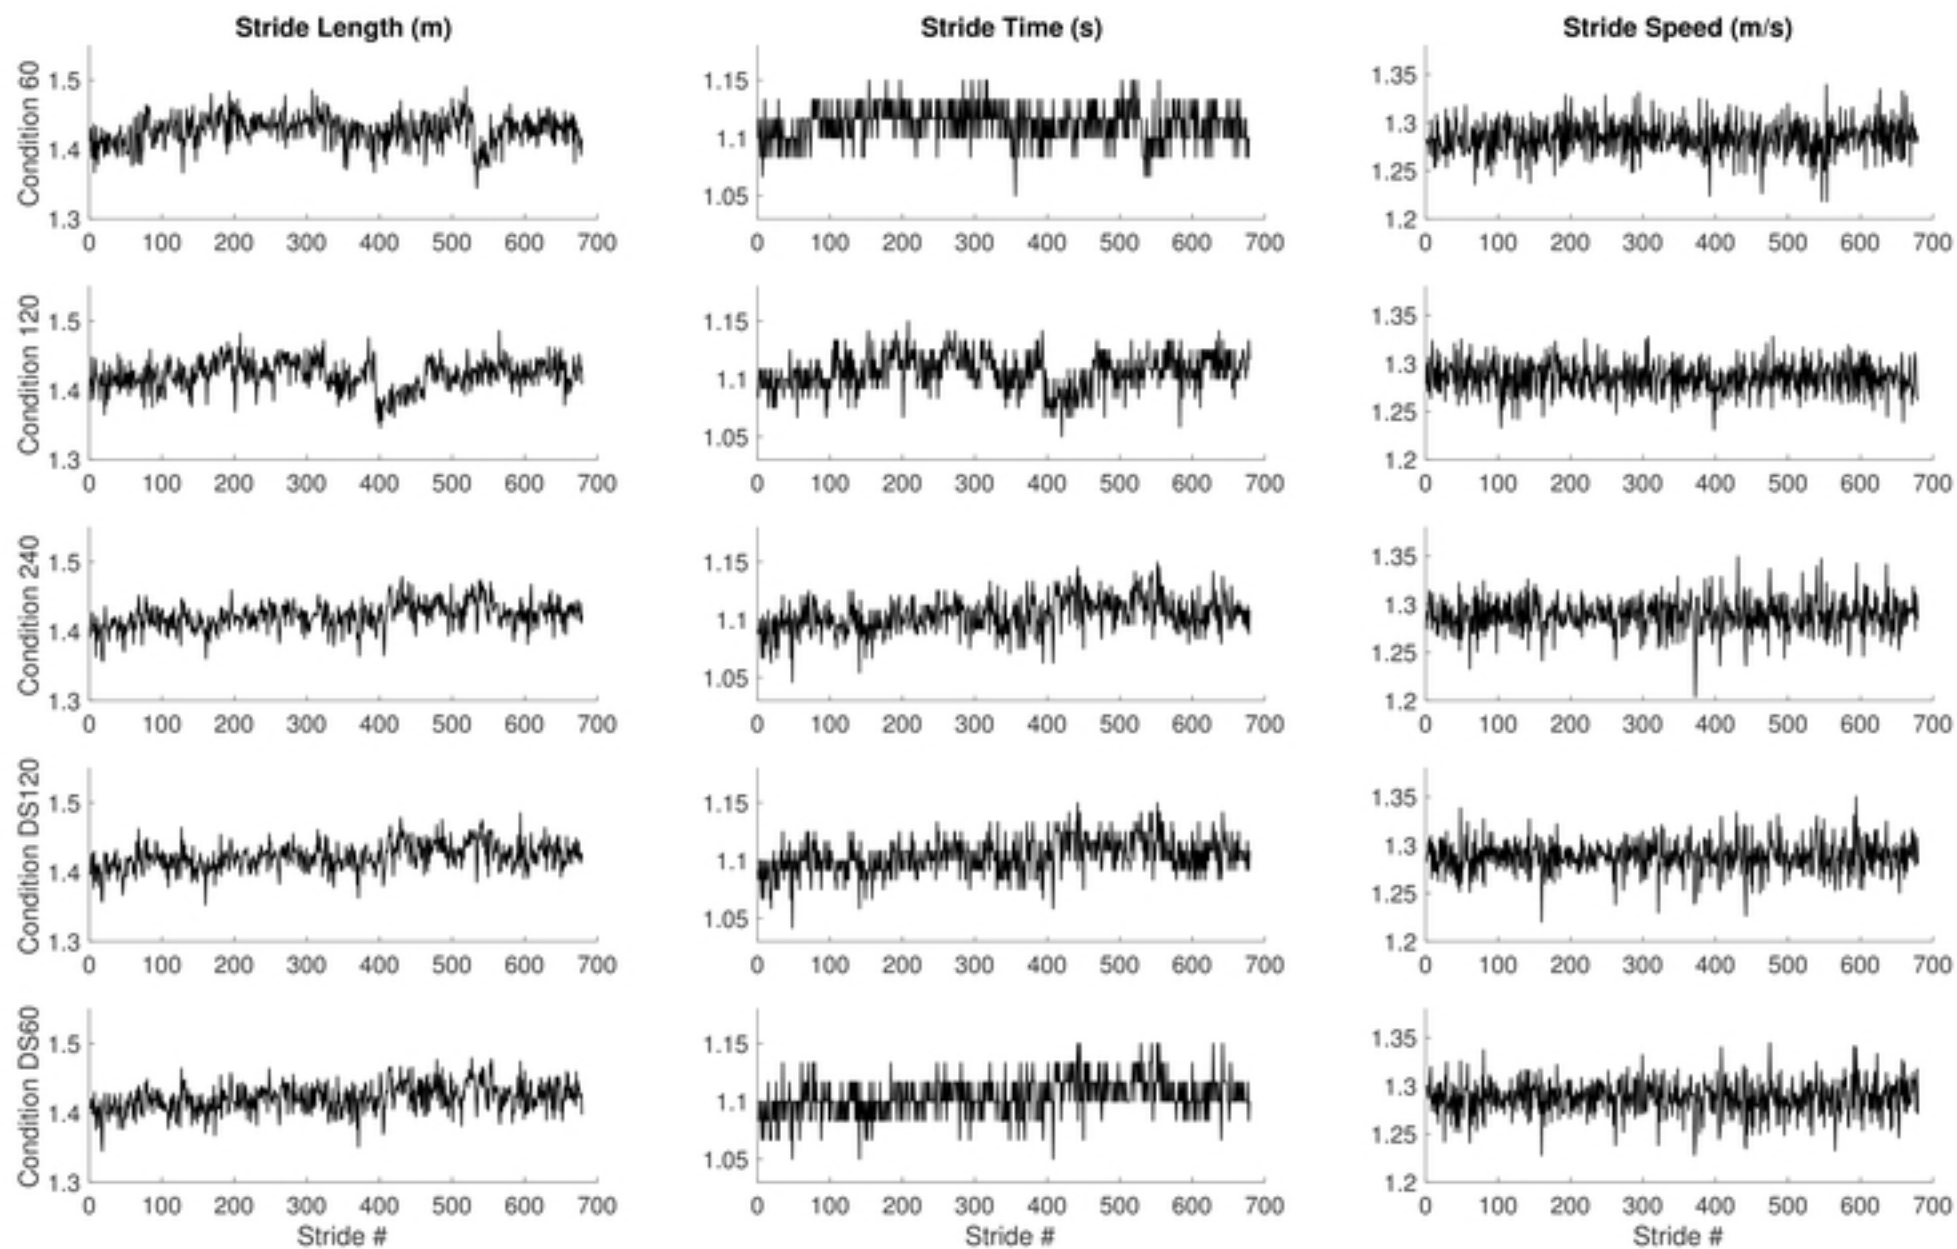

Fig1

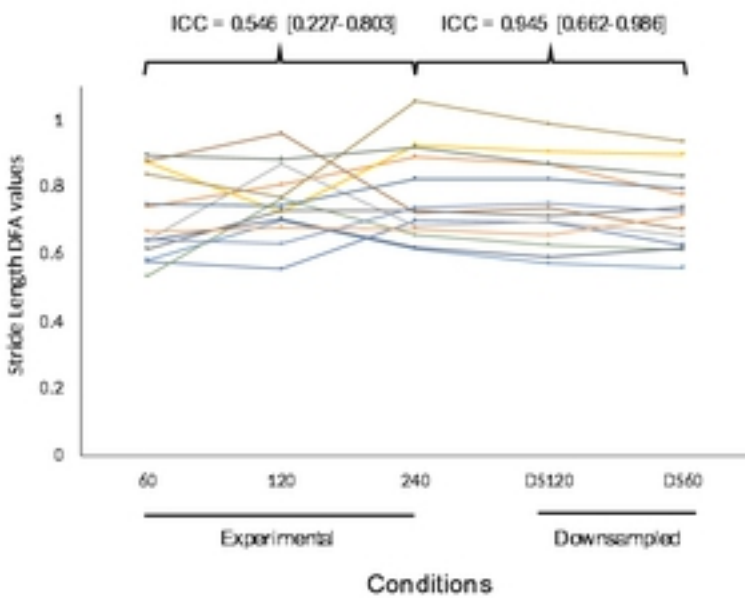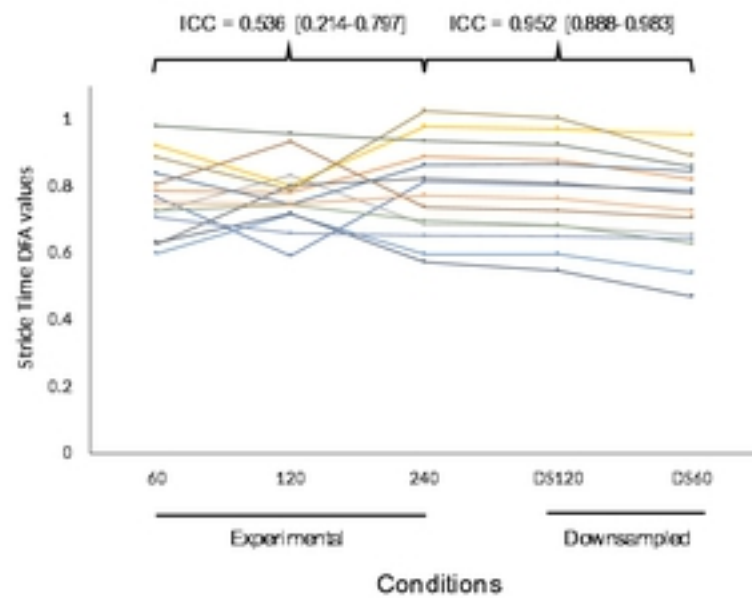

Fig2
